# Supplementary material for: Structures of the kinetically trapped i-motif DNA intermediates
Source: Royal Society of Chemistry journal article supplement (doi:10.1039/c6cp04418b), 2016-01-01

## Supporting Information

### Structures of the kinetically trapped i-motif DNA intermediates

Alyssa Garabedian<sup>1</sup>; David Butcher<sup>1</sup>; Jennifer L. Lippens<sup>2</sup>; Jaroslava Miksovska<sup>1,3</sup>; Prem P. Chapagain<sup>3,4</sup>; Daniele Fabris<sup>2</sup>; Mark E. Ridgeway<sup>5</sup>; Melvin A. Park<sup>5</sup>, and Francisco Fernandez-Lima<sup>1,3\*</sup>.

<sup>1</sup> *Department of Chemistry and Biochemistry, Florida International University, Miami, USA*

<sup>2</sup> *The RNA Institute, University at Albany, Albany, USA*

<sup>3</sup> *Biomolecular Science Institute, Florida International University, Miami, USA*

<sup>4</sup> *Department of Physics, Florida International University, Miami, USA*

<sup>5</sup> *Bruker Daltonics Inc., Billerica, Massachusetts, USA*

#### AUTHOR INFORMATION

##### Corresponding Author

\*Phone: 305-348-2037. Fax: 305-348-3772. E-mail: fernandf@fiu.edu.

#### Table of contents:

Figure 1. TIMS profiles as a function of the desolvation time for [M-5H]<sup>-5</sup> i-motif DNA.

Figure 2. TIMS profiles as a function of the desolvation time for [M-6H]<sup>-6</sup> i-motif DNA.

Figure 3. TIMS profiles as a function of the desolvation time for [M-7H]<sup>-7</sup> i-motif DNA.

Figure 4. TIMS profiles as a function of the desolvation time for [M-8H]<sup>-8</sup> i-motif DNA.

Figure 5. TIMS profiles as a function of the desolvation time for [M-9H]<sup>-9</sup> i-motif DNA.

Figure 1. TIMS profiles as a function of the desolvation time for  $[M-5H]^{-5}$  i-motif DNA.

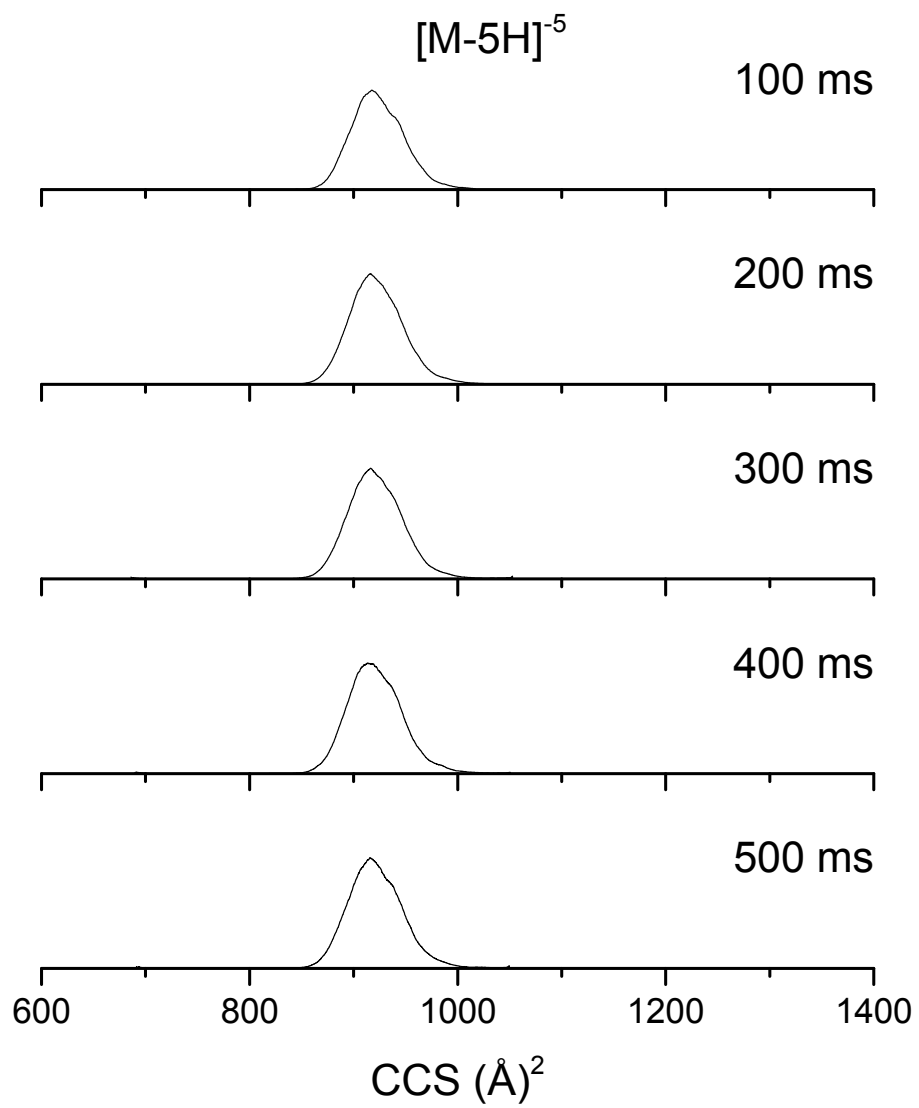

Figure 2. TIMS profiles as a function of the desolvation time for [M-6H]<sup>-6</sup> i-motif DNA.

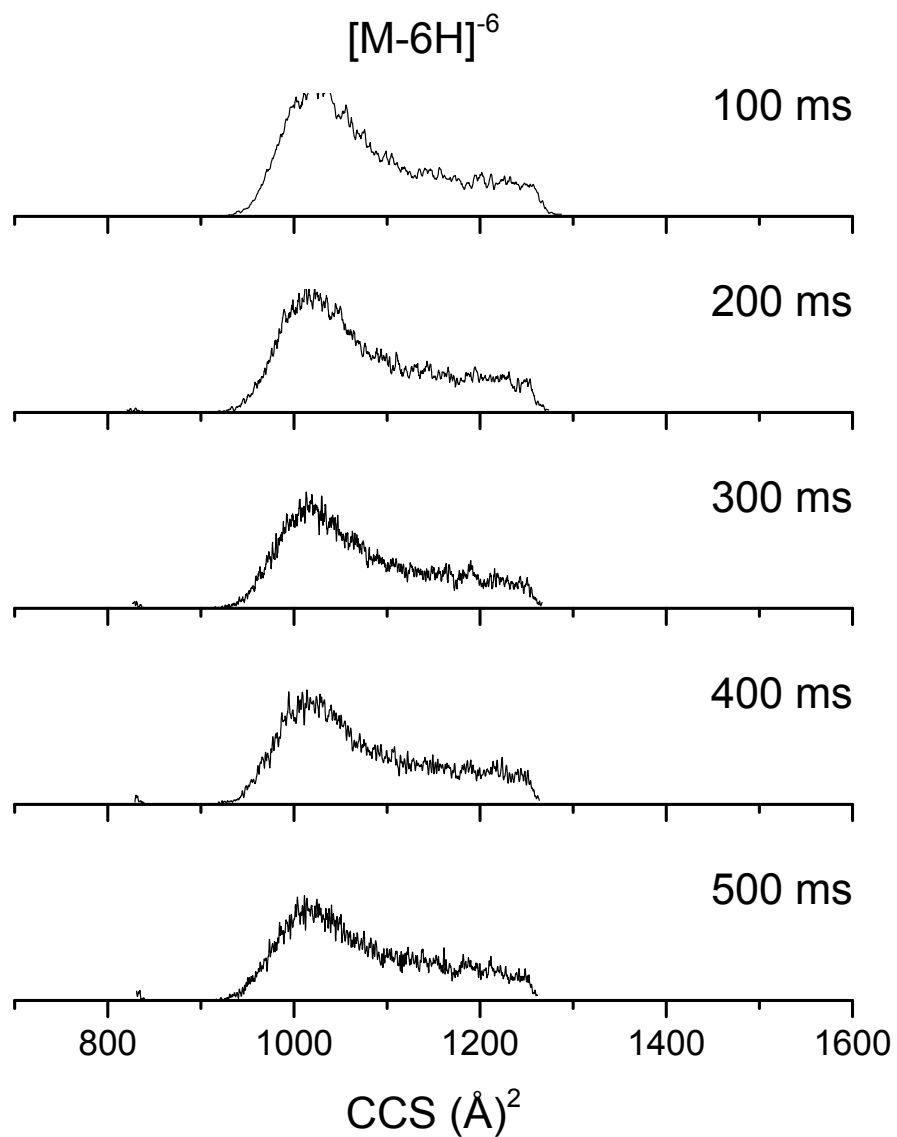

Figure 3. TIMS profiles as a function of the desolvation time for  $[M-7H]^{-7}$  i-motif DNA.

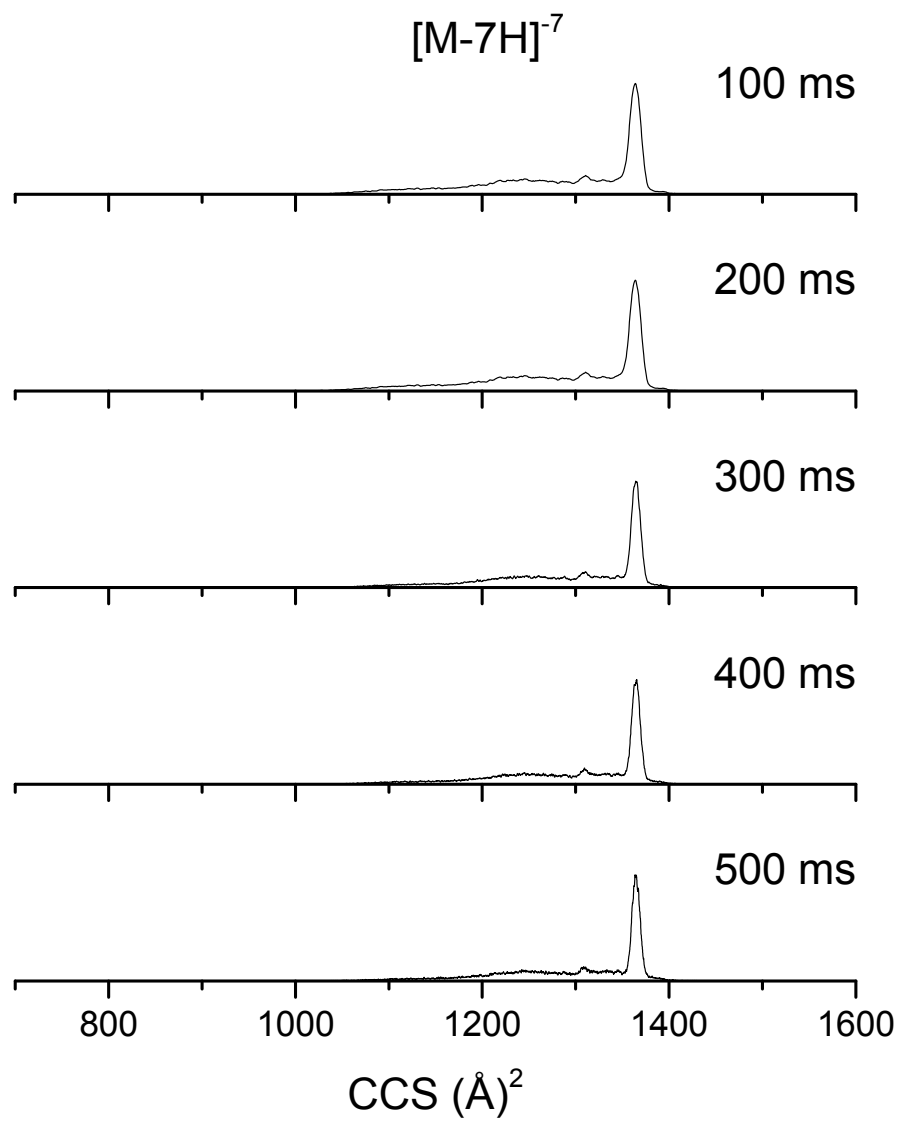

Figure 4. TIMS profiles as a function of the desolvation time for  $[M-8H]^{-8}$  i-motif DNA.

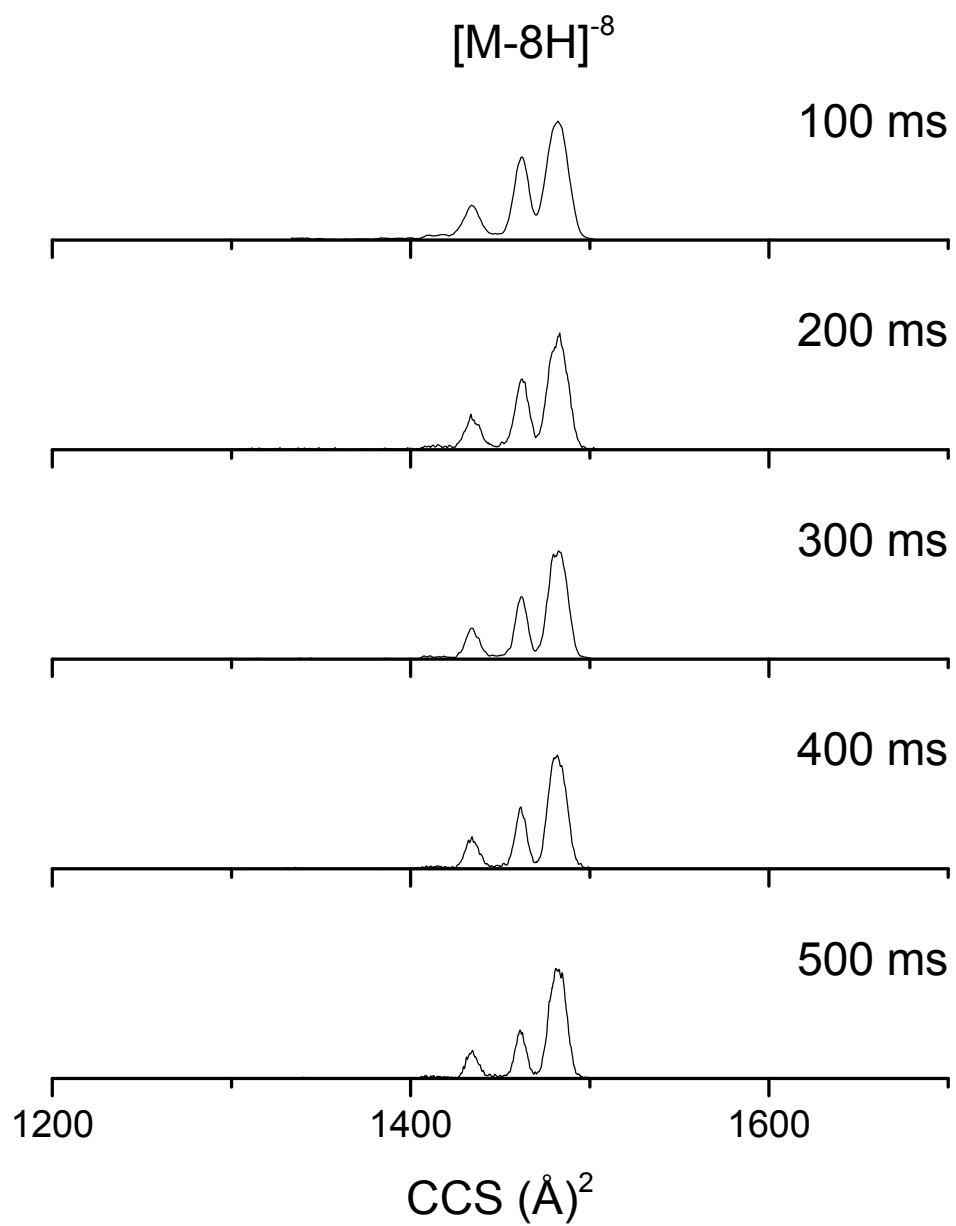

Figure 5. TIMS profiles as a function of the desolvation time for  $[M-9H]^{-9}$  i-motif DNA.

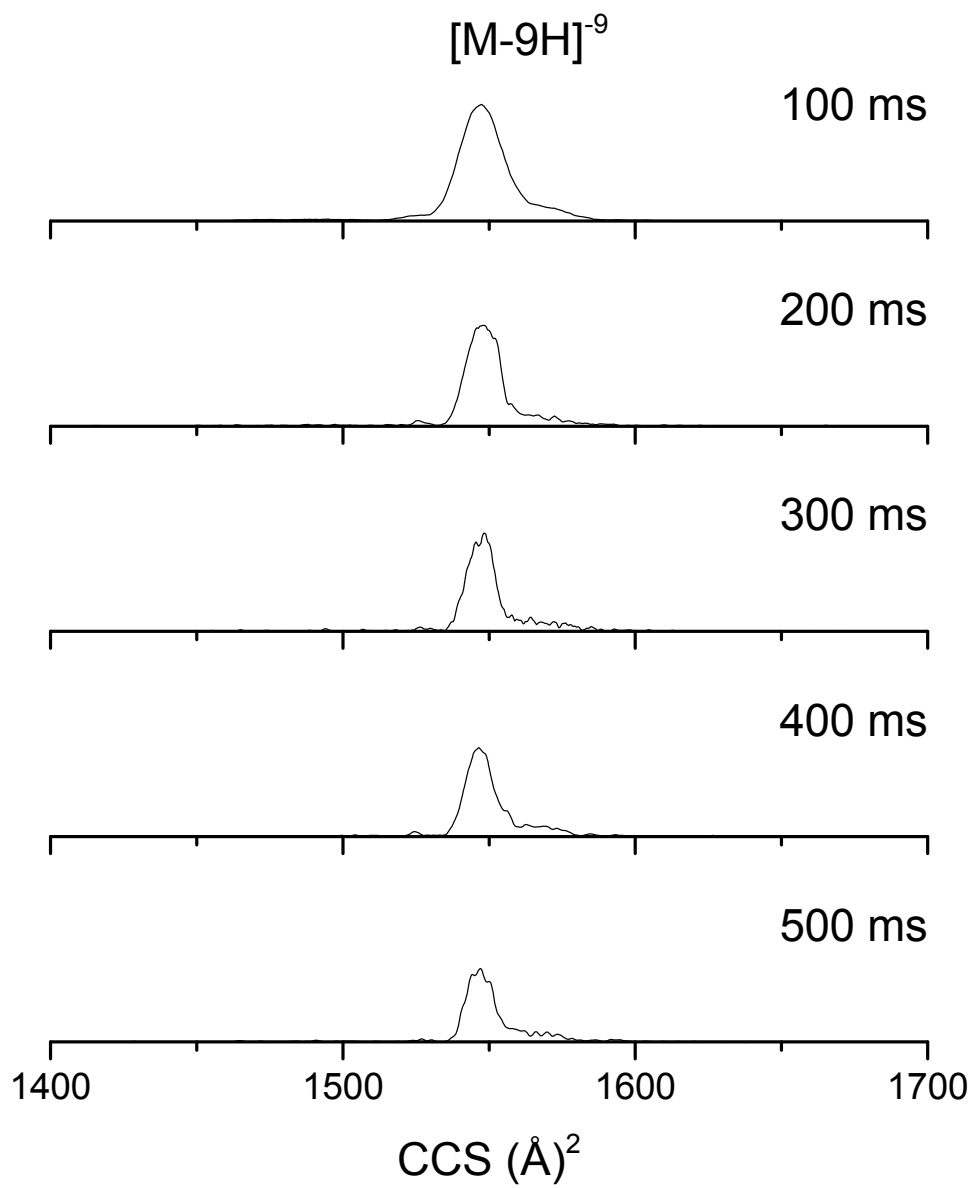

Supplement: c6cp04418b2.pdf [file c6cp04418b2.pdf]
